# Supplementary material for: Probiotic responder identification in cross-over trials for constipation using a Bayesian statistical model considering lags between intake and effect periods
Source: bioRxiv or medRxiv preprint supplement (doi:10.1101/2022.03.14.22272054), 2023-10-24
Supplement: Supplementary file [file media-1.pdf]

# Supplementary Materials for “Identification of probiotic responders in cross-over trials using the Bayesian statistical model considering lags of effect period”

Shion Hosoda<sup>1,2\*</sup>, Yuichiro Nishimoto<sup>3</sup>, Yohsuke Yamauchi<sup>3</sup>, Takuji Yamada<sup>3,4</sup>, and Michiaki Hamada<sup>1,2,5\*</sup>

<sup>1</sup>Department of Electrical Engineering and Bioscience, Graduate School of Advanced Science and Engineering, Waseda University, Tokyo, Japan

<sup>2</sup>Computational Bio Big-Data Open Innovation Laboratory, AIST-Waseda University, Tokyo, Japan

<sup>3</sup>Metabologenomics Inc., Yamagata, Japan

<sup>4</sup>Department of Life Science and Technology, Tokyo Institute of Technology, Tokyo, Japan

<sup>5</sup>Graduate School of Medicine, Nippon Medical School, Tokyo, Japan

\*To whom correspondence should be addressed.

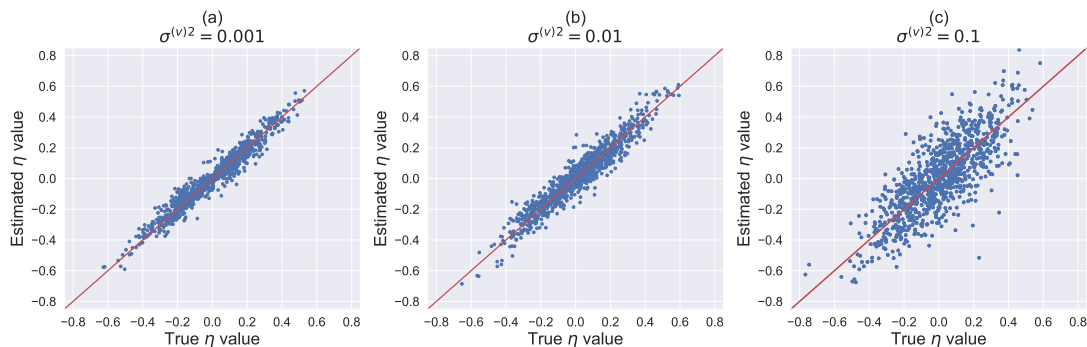

Figure S1: Scatter plots of the true  $\eta$  and estimated posterior expectation of  $\eta$  for each synthetic dataset, where the number of observation points was the same as that of the real dataset. The  $x$ - and  $y$ - axes indicate the true  $\eta$  and estimated  $\eta$  values, respectively. a, b, and c indicate  $\sigma^{(v)2} = 0.001$ ,  $\sigma^{(v)2} = 0.01$ , and  $\sigma^{(v)2} = 0.1$ , respectively. The red line indicates that  $y = x$ .

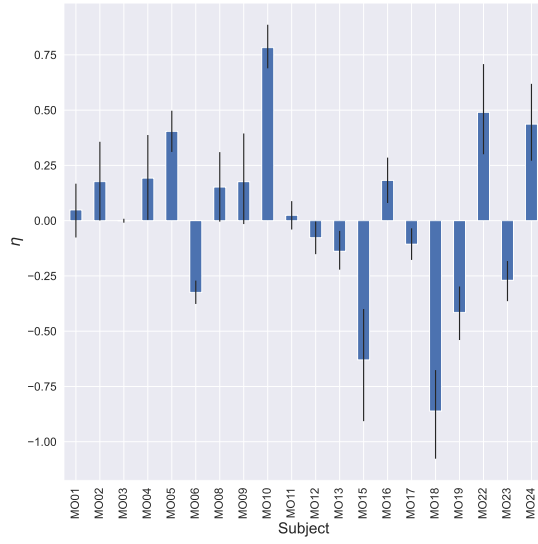

Figure S2: Posterior distributions estimated by the base model (*cf.* Section 3.1 in the main text) of  $\eta$  for each subject. The legend is the same as in Fig. 4 in the main text.

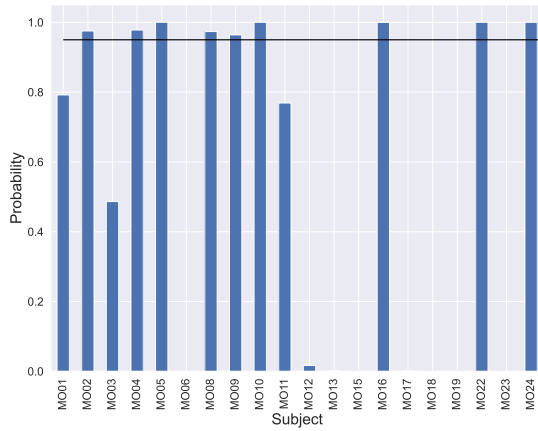

Figure S3: Probability that each subject is a responder based on the posterior distribution estimated by the base model (*cf.* Section 3.1 in the main text). The legend is the same as that in Fig. 5 in the text.

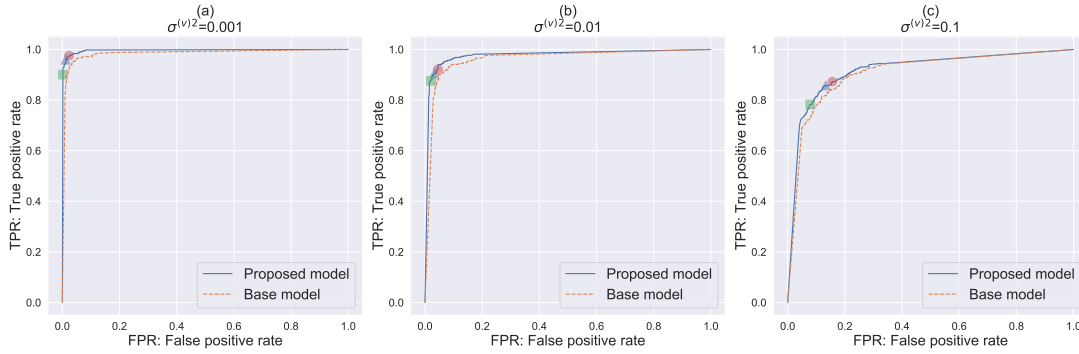

Figure S4: The AUC-ROC curve for identifying responders based on the estimated  $\eta$  in the synthetic datasets of  $N = 151$  and  $(d_1, d_2, d_3, d_4) = (51, 76, 126, 151)$  using the proposed method when  $\mu_{\max} = \nu_{\max} = 5$  and  $\mu_{\max} = \nu_{\max} = 0$ . The legend is the same as in Fig. 3 in the main text.

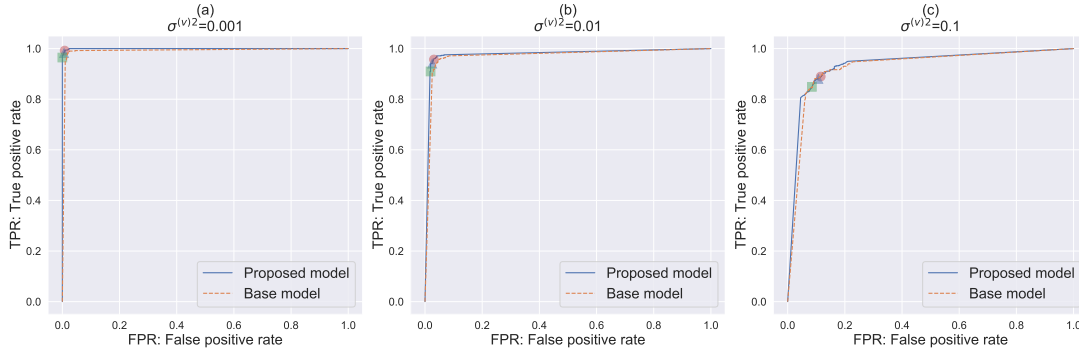

Figure S5: The AUC-ROC curve for identifying responders based on the estimated  $\eta$  in the synthetic datasets of  $N = 301$  and  $(d_1, d_2, d_3, d_4) = (101, 151, 251, 301)$  using the proposed method when  $\mu_{\max} = \nu_{\max} = 5$  and  $\mu_{\max} = \nu_{\max} = 0$ . The legend is the same as in Fig. 3 in the main text.
